Anesthesiology  
65:673-677, 1986

## Effect of Anesthetic Induction Regimens on Oxygen Saturation in Cyanotic Congenital Heart Disease

R. S. LAISHLEY, M.B., F.F.A.R.C.S.,\* F. A. BURROWS, M.D., F.R.C.P.C.,† J. LERMAN, M.D., F.R.C.P.C.,†  
W. L. ROY, M.D., F.R.C.P.C.†

The optimal induction regimen for general anesthesia in infants and children with cyanotic congenital heart disease (CCHD) should maintain or improve arterial blood oxygen saturation ( $Sa_{O_2}$ ) and maintain cardiovascular stability. Both intravenous and inhalational drug regimens have been recommended for induction of general anesthesia in children with CCHD to minimize changes in oxygenation and hemodynamic variables.<sup>1-3</sup> However, the effects of these induction regimens on  $Sa_{O_2}$  in children with CCHD have not been compared.

Pulse oximetry is a new, noninvasive technique for measuring  $Sa_{O_2}$ . Oxygen saturation as determined by pulse oximetry correlates closely with direct  $Sa_{O_2}$  measurements.<sup>4</sup> Because oxygen saturation in infants and children with CCHD lies on the steep portion of the oxy-hemoglobin dissociation curve,<sup>5</sup> pulse oximetry is a useful and sensitive noninvasive technique for estimating oxygen saturation in children with CCHD.

The purpose of this study was to investigate the effect of five anesthetic induction regimens on  $Sa_{O_2}$  during induction of anesthesia in infants and children with CCHD.

### METHODS

With approval from the Committee on Human Research, 50 infants and children with CCHD presenting for elective cardiac surgery were studied. All patients were ASA Physical Status II or III, fasting and premedicated.

\* Fellow, Department of Anaesthesia, The Hospital for Sick Children, Toronto.

† Assistant Professor, Department of Anaesthesia, University of Toronto.

Received from the Department of Anaesthesia and the Research Institute, The Hospital for Sick Children, University of Toronto, Toronto, Ontario. Accepted for publication July 17, 1986. Presented in part at the Annual Meeting of The American Society of Anesthesiologists, San Francisco, October 1985.

Dr. Laishley's current appointment: Senior Registrar in Anaesthesia, St. Thomas' Hospital, London, United Kingdom.

Address reprint requests to Dr. Burrows: Department of Anaesthesia, The Hospital for Sick Children, 555 University Avenue, Toronto, Ontario, Canada M5G 1X8.

Key words: Anesthesia: cardiac; pediatric. Anesthetics, intravenous: fentanyl; ketamine; thiopental. Anesthetics, volatile: halothane. Circulation: heart rate; systolic blood pressure. Measurement techniques: oximetry.

Infants (less than 1 yr of age) were premedicated with intramuscular atropine  $0.02 \text{ mg} \cdot \text{kg}^{-1}$  1 h prior to surgery, whereas children (greater than 1 yr of age) were premedicated with pentobarbital  $2 \text{ mg} \cdot \text{kg}^{-1}$  per rectum 2 h prior to surgery, and atropine  $0.02 \text{ mg/kg}$  with morphine  $0.2 \text{ mg} \cdot \text{kg}^{-1}$  intramuscularly 1 h prior to surgery.

Each child was arbitrarily assigned to receive one of five induction regimens according to the discretion of the attending anesthetists: thiopental; fentanyl; ketamine; thiopental and fentanyl; or halothane. Any child considered to be unsuitable for any one of the induction regimens was excluded from the entire study. Each of the anesthetists who participated in the study administered each of the induction regimens at least once.

On arrival in the operating room, the patients were placed supine and monitored with a precordial stethoscope, blood pressure cuff, Doppler pulse detector, and electrocardiogram. A pulse oximeter probe (model N-100, Nellcor Inc., Hayward, CA) was applied to the first toe on each patient. After preoxygenation for 2 min, the patients were anesthetized with one of the above induction regimens. All induction regimens were administered intravenously except for halothane. Each intravenous agent was administered as an initial sleep dose with further increments prior to laryngoscopy. Halothane was administered with increasing inspired concentrations to a maximum of 2% (vaporizer setting). Pancuronium  $0.15 \text{ mg} \cdot \text{kg}^{-1}$  was administered intravenously to facilitate endotracheal intubation in all patients. Ventilation was controlled manually. After intubation, the end-tidal  $P_{CO_2}$  was measured continuously from the distal end of the endotracheal tube (Puritan-Bennett®  $CO_2$  analyzer). Ventilation was adjusted to maintain an end-tidal  $P_{CO_2}$  between 30 and 35 mmHg. Positive end-expiratory pressure was avoided.

During the period of study,  $Sa_{O_2}$ , heart rate, and systolic blood pressure were measured simultaneously at five intervals: 1) air (before induction of anesthesia while breathing room air); 2) preinduction (following 2 min of preoxygenation); 3) postinduction (1, 3, and 5 min after completion of induction of anesthesia); 4) laryngoscopy; and 5) postintubation at 30 s, 1, and 2 min.

The "air" measurements were recorded while the patients were breathing room air. All subsequent measure-

TABLE 1. Demographic Data

|                                                        | Thiopental | Fentanyl   | Ketamine   | Thiopental<br>Fentanyl | Halothane |
|--------------------------------------------------------|------------|------------|------------|------------------------|-----------|
| Age (yr)                                               | 3.1 ± 0.8  | 2.5 ± 0.6  | 4.0 ± 1.6  | 3.1 ± 0.6              | 2.2 ± 0.7 |
| Weight (kg)                                            | 11.8 ± 1.6 | 11.1 ± 1.6 | 13.5 ± 2.7 | 11.6 ± 1.4             | 9.3 ± 1.2 |
| Number of patients with:                               |            |            |            |                        |           |
| TOF                                                    | 5          | 4          | 6          | 6                      | 6         |
| TGA                                                    | 2          | 3          | 2          | 1                      | 1         |
| Misc                                                   | 3          | 3          | 2          | 3                      | 3         |
| Number of infants                                      | 4          | 4          | 3          | 1                      | 5         |
| Number of patients with previous<br>palliative surgery | 6          | 7          | 5          | 4                      | 4         |

Data are mean ± SE.

TOF = tetralogy of Fallot. TGA = transposition of the great arteries.  
Misc = miscellaneous lesions (see "Results").

ments were recorded while the patients were breathing 100% oxygen (except, of course, for the halothane group, which breathed 98–99% oxygen).

Statistical significance ( $P < 0.05$ ) was determined using analysis of variance and the Student-Newman-Keuls test for the  $SaO_2$ , heart rate, and systolic blood pressure data, and the Fisher exact test for comparing the number of specific cardiac lesions, the number of palliative shunts, and the number of infants among the five groups.

## RESULTS

Fifty patients were divided into five groups of equal size (table 1). There were no significant differences in age and weight among the five groups. Cyanotic cardiac lesions were classified as tetralogy of Fallot (TOF), transposition of great arteries (TGA), and miscellaneous (misc). The miscellaneous group included ventricular septal defect with pulmonary and/or tricuspid valve disease and other complex cyanotic cardiac lesions. There was no significant difference in the number of each of the cyanotic lesions among the five groups. There were no significant differences in either the number of infants or the number of patients with previous palliative surgery among the five groups (table 1). Previous palliative surgery included atrial septostomy and aorto-pulmonary shunts. Thirty patients

were receiving chronic cardiovascular drug therapy including digoxin, Aldactazide,<sup>®</sup> and propranolol prior to surgery. There was no significant differences in the number of the patients taking these drugs among the five groups.

The total dose of each intravenous agent administered includes the initial sleep dose plus any further incremental doses administered prior to laryngoscopy (table 2). In the group anesthetized with halothane, the inspired concentration (vaporizer setting) was increased in 0.5% increments to 2% during induction of anesthesia. Thereafter, it was decreased to 1.0% for the remainder of the study.

The awake values for  $SaO_2$  did not differ significantly among the five groups of patients (fig 1). The standard errors of the means were similar for each mean value shown in figure 1. Standard error bars for halothane and fentanyl only were included for clarity.  $SaO_2$  increased significantly following the preinduction (preoxygenation) measurement and at all measurements after induction of anesthesia when compared with the awake measurements breathing room air (fig 1).  $SaO_2$  measurements did not differ significantly among the five groups at any time.

Heart rate increased significantly ( $P < 0.05$ ) in the ketamine and halothane groups (table 3). In the ketamine group, heart rate increased significantly at 1 min postinduction and at all subsequent measurements when compared with the air and preinduction measurements. In the halothane group, heart rate increased significantly at laryngoscopy and at all subsequent measurements when compared with the measurements at 1, 3, and 5 min postinduction. Heart rate did not differ significantly among the five groups at any time.

Systolic blood pressure remained unchanged compared with baseline measurements, with two exceptions (table 4). In the thiopental group, systolic blood pressure increased significantly after laryngoscopy when compared with the 5-min postinduction measurement. In the halothane group, systolic blood pressure decreased signifi-

TABLE 2. Total Doses of Induction Agents

|      | Thiopental            | Fentanyl              | Ketamine              | Thiopental<br>Fentanyl | Halothane |
|------|-----------------------|-----------------------|-----------------------|------------------------|-----------|
| Dose | 5.7 ± 0.5             | 42.1 ± 8.0            | 2.1 ± 0.4             | 3.7 ± 0.5              | 0.5–2.0   |
| Unit | mg · kg <sup>-1</sup> | μg · kg <sup>-1</sup> | mg · kg <sup>-1</sup> | mg · kg <sup>-1</sup>  | %*        |
| Dose |                       |                       |                       | 6.2 ± 1.1              |           |
| Unit |                       |                       |                       | μg · kg <sup>-1</sup>  |           |

Data are mean ± SE.

\* Inspired concentration, vaporizer setting.

FIG. 1. Oxygen saturations during the period of study for the five groups. Data are mean  $\pm$  SEM. Time axis: Air = awake control measurements; Pre-Ind = preinduction following preoxygenation; 1 min, 3 min, 5 min = intervals postinduction. LAR = laryngoscopy; 0.5 min, 1 min, 2 min = intervals post-intubation.

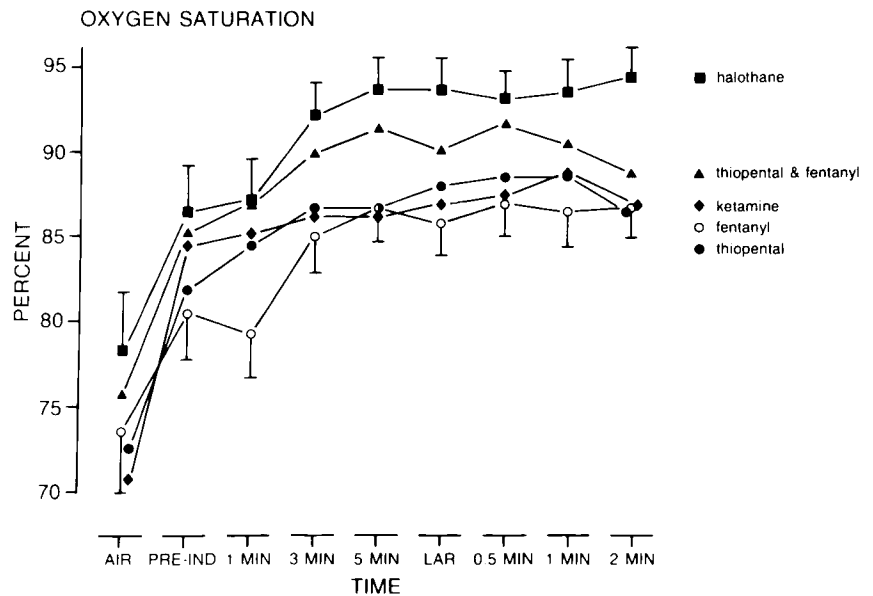

cantly 5 min postinduction when compared with the awake measurement.

DISCUSSION

The optimal induction regimen for patients with CCHD should maintain or improve SaO<sub>2</sub> and maintain cardiovascular stability. Although ketamine is recommended for induction of anesthesia in patients with CCHD,<sup>1</sup> all five induction regimens in this study were equally effective in maintaining or improving SaO<sub>2</sub>, heart rate, and systolic blood pressure. Ketamine is recommended for induction of anesthesia in patients with CCHD because of its cardiovascular stability.<sup>1</sup> Previous studies reported that ketamine did not alter heart rate, blood pressure, or intracardiac shunt in children with CCHD either prior to surgical repair<sup>6</sup> (breathing spontaneously) or after surgical

repair (ventilated).<sup>7</sup> In the present study, ketamine maintained heart rate and systolic blood pressure.

Fentanyl is effective for induction of anesthesia in children with CCHD because systolic blood pressure and cardiac output remain unchanged. Theoretically, fentanyl will also decrease oxygen consumption.<sup>8</sup> Hickey *et al.*<sup>9</sup> reported no significant changes in either pulmonary or systemic hemodynamics in ventilated infants after cardiac surgical repair during fentanyl anesthesia. In a further study, Hickey and Hansen<sup>10</sup> found a significant increase in transcutaneous oxygen tension following induction of anesthesia with fentanyl in children with CCHD. The results of our study are in agreement with their findings and indicate that induction of anesthesia with fentanyl and 100% oxygen is associated with an increase in SaO<sub>2</sub> in patients with CCHD.

TABLE 3. Heart Rate during Induction of Anesthesia

|                | Thiopental   | Fentanyl     | Ketamine      | Thiopental Fentanyl | Halothane    |
|----------------|--------------|--------------|---------------|---------------------|--------------|
| Air            | 144 $\pm$ 9  | 149 $\pm$ 9  | 145 $\pm$ 11  | 139 $\pm$ 10        | 132 $\pm$ 4  |
| Preinduction   | 148 $\pm$ 10 | 143 $\pm$ 7  | 146 $\pm$ 12  | 129 $\pm$ 9         | 131 $\pm$ 8  |
| Postinduction  |              |              |               |                     |              |
| 1 min          | 148 $\pm$ 11 | 144 $\pm$ 10 | 157 $\pm$ 10* | 137 $\pm$ 8         | 125 $\pm$ 6  |
| 3 min          | 145 $\pm$ 10 | 143 $\pm$ 8  | 159 $\pm$ 11* | 130 $\pm$ 9         | 124 $\pm$ 6  |
| 5 min          | 144 $\pm$ 9  | 140 $\pm$ 8  | 159 $\pm$ 10* | 133 $\pm$ 8         | 126 $\pm$ 5  |
| Laryngoscopy   | 149 $\pm$ 8  | 146 $\pm$ 9  | 159 $\pm$ 10* | 134 $\pm$ 7         | 146 $\pm$ 5† |
| Postintubation |              |              |               |                     |              |
| 30 s           | 152 $\pm$ 8  | 143 $\pm$ 9  | 161 $\pm$ 10* | 142 $\pm$ 8         | 147 $\pm$ 5† |
| 1 min          | 148 $\pm$ 8  | 146 $\pm$ 9  | 163 $\pm$ 11* | 136 $\pm$ 7         | 145 $\pm$ 5† |
| 2 min          | 147 $\pm$ 8  | 142 $\pm$ 10 | 164 $\pm$ 11* | 136 $\pm$ 9         | 144 $\pm$ 6† |

Data are mean (beat/min)  $\pm$  SE.

\* P < 0.05 compared with air and preinduction.

† P < 0.05 compared with 1, 3, and 5 min postinduction.

TABLE 4. Systolic Blood Pressure during Induction of Anesthesia

|                | Thiopental | Fentanyl | Ketamine | Thiopental Fentanyl | Halothane |
|----------------|------------|----------|----------|---------------------|-----------|
| Air            | 102 ± 5    | 105 ± 5  | 106 ± 5  | 94 ± 4              | 94 ± 5    |
| Preinduction   | 102 ± 5    | 104 ± 6  | 109 ± 6  | 94 ± 5              | 91 ± 5    |
| Postinduction  |            |          |          |                     |           |
| 1 min          | 99 ± 4     | 104 ± 3  | 113 ± 5  | 92 ± 5              | 90 ± 4    |
| 3 min          | 98 ± 4     | 103 ± 4  | 111 ± 7  | 88 ± 4              | 88 ± 4    |
| 5 min          | 96 ± 3     | 106 ± 5  | 110 ± 7  | 86 ± 3              | 81 ± 5†   |
| Laryngoscopy   | 110 ± 6*   | 107 ± 6  | 113 ± 6  | 88 ± 3              | 86 ± 7    |
| Postintubation |            |          |          |                     |           |
| 30 s           | 108 ± 4    | 104 ± 6  | 111 ± 7  | 88 ± 3              | 89 ± 8    |
| 1 min          | 106 ± 3    | 104 ± 6  | 111 ± 8  | 90 ± 4              | 89 ± 8    |
| 2 min          | 104 ± 3    | 103 ± 6  | 113 ± 8  | 89 ± 5              | 89 ± 7    |

Data are mean (mmHg) ± SE.

\*  $P < 0.05$  compared with 5 min postinduction.

†  $P < 0.05$  compared with air.

Halothane and thiopental have been used for induction of anesthesia in infants and children with CCHD.<sup>11</sup> Both of these drugs may cause calcium-dependent myocardial depression<sup>12</sup> and peripheral vasodilation.<sup>13-15</sup> These two latter effects may alter the degree of the right-to-left intracardiac shunt or interatrial mixing and thereby decrease  $Sa_{O_2}$ . Although halothane was associated with a decrease in systolic blood pressure (5 min postinduction, table 4), there was no corresponding decrease in  $Sa_{O_2}$ . Our data for halothane are in agreement with Hensley *et al.*,<sup>16</sup> who reported that  $Sa_{O_2}$  increases in children with CCHD after an inhalational induction with halothane, 70% nitrous oxide, and 30% oxygen. The results of our study also indicate that both thiopental alone and thiopental in combination with fentanyl may be used without detrimental effect on  $Sa_{O_2}$  in these patients, provided the drugs are administered in incremental doses.

$Sa_{O_2}$  is affected by several factors in patients with CCHD: 1) the inspired fraction of oxygen; 2) the extent of right-to-left shunting or mixing; 3) oxygen consumption; 4) cardiac output; and 5) the mixed venous oxygen tension.<sup>17</sup> If the magnitude of the right-to-left shunt is 35% or less,  $Sa_{O_2}$  will increase when the inspired fraction of oxygen is increased.<sup>18</sup> In the present study,  $Sa_{O_2}$  increased in all five groups when the inspired fraction of oxygen was increased from 21% to 100% (before the induction of anesthesia). Because all of the children were heavily premedicated and well sedated, both the functional residual capacity,<sup>19-24</sup> and the chemoreceptor sensitivity to oxygen<sup>25</sup> may have decreased during the preinduction period in the unstimulated premedicated child. However, when the child was then stimulated by applying a mask to the face, he or she was suddenly aroused and ventilation may have increased, resulting in an increase in  $Sa_{O_2}$ .<sup>26</sup>

Our study dealt with a heterogeneous population of patients with CCHD. Forty-one patients (82%) were at risk for right-to-left shunting and arterial oxygen desaturation.

Although  $Sa_{O_2}$  increased significantly during induction of anesthesia with all five induction regimens, we are not able to conclude that right-to-left shunt does not increase with any of these regimens. It is possible that if the degree of right-to-left shunt had increased during induction of anesthesia, this was offset by a concomitant decrease in oxygen consumption and increase in cardiac output, both of which increase mixed venous oxygen saturation of the shunted blood.<sup>17,27-30</sup> The relative importance of each of these factors on  $Sa_{O_2}$  remains unclear. Our results in this heterogeneous population of patients however, are in agreement with similar data<sup>‡</sup> from a homogenous population (tetralogy of Fallot) of children in which induction of anesthesia with either intramuscular ketamine or halothane by mask resulted in similar increases in  $Sa_{O_2}$ .

$Sa_{O_2}$  increased significantly in the nine patients with TGA (18%) anesthetized with the five induction regimens. Because of their anatomy, these patients rely on interatrial mixing of oxygenated and venous blood to provide systemic oxygen delivery. In these patients the degree of right-to-left shunt is balanced by the degree of left-to-right shunt; together, these two factors determine the degree of interatrial mixing. Arterial desaturation will occur with a decrease in the degree of interatrial mixing. However, as discussed previously in relation to right-to-left shunts, we cannot conclude that interatrial mixing *per se* was not reduced during induction of anesthesia in patients with TGA. This, again, is due to our inability to measure all of the factors influencing the  $Sa_{O_2}$ . Nevertheless, the net result of the five induction regimens is an increase in  $Sa_{O_2}$  in patients with TGA.

In summary, the results of this study indicate that all five induction regimens evaluated may be used safely during induction of anesthesia in infants and children with CCHD.

‡ Greeley WD, Bushman G, Davis DP, Reves J: unpublished data, 1986.

The authors thank T. Cain for her assistance in preparing this manuscript.

#### REFERENCES

1. Bland JW, Williams WH: Anesthesia for treatment of congenital heart defects, *Cardiac Anesthesia*. Edited by Kaplan AJ. New York, Grune and Stratton, 1979, pp 281–346
2. Beynen FM, Tarhan S: Anesthesia for surgical repair of congenital heart defects in children, *Cardiovascular Anesthesia and Post-operative Care*. Edited by Tarhan S. Chicago, Year Book Medical Publishers, 1982, pp 73–180
3. Abbott TR: Anesthesia for cardiac surgery in children, *Paediatric Anaesthesia—Trends in Current Practice*. Edited by Rees JG, Gray CT. London, Butterworths, 1981, pp 115–144
4. Yelderman M, New W: Evaluation of pulse oximetry. *ANESTHESIOLOGY* 59:349–352, 1983
5. Deckart R, Steward DJ: Noninvasive arterial hemoglobin oxygen saturation *versus* transcutaneous oxygen tension monitoring in the preterm infant. *Crit Care Med* 12:935–939, 1984
6. Morray JP, Lynn AM, Stamm SJ, Herndon PS, Kawabori I, Stevenson JG: Hemodynamic effects of ketamine in children with congenital heart disease. *Anesth Analg* 63:895–899, 1984
7. Hickey PR, Hansen DD, Cramolini GM, Vincent RN, Lang P: Pulmonary and systemic responses to ketamine in infants with normal and elevated pulmonary vascular resistances. *ANESTHESIOLOGY* 62:287–293, 1985
8. Hickey PR, Hansen DD, Norwood WI, Castaneda AR: Anesthetic complications in surgery for congenital heart disease. *Anesth Analg* 63:657–664, 1984
9. Hickey PR, Hansen DD, Wessel DL, Lang P, Jonas RA: Pulmonary and systemic hemodynamic responses to fentanyl in infants. *Anesth Analg* 64:483–486, 1985
10. Hickey PR, Hansen DD: Fentanyl- and sufentanil-oxygen-pancuronium anesthesia for cardiac surgery in infants. *Anesth Analg* 63:117–124, 1984
11. Moffitt EA, McGoan DC, Ritter DG: The diagnosis and correction of congenital cardiac defects. *ANESTHESIOLOGY* 33:144–160, 1970
12. Komai H, Rusy BF: Differences in the myocardial depressant action of thiopental and halothane. *Anesth Analg* 63:313–318, 1984
13. Price HL, Price ML: Has halothane a predominant circulatory action? *ANESTHESIOLOGY* 27:764–769, 1966
14. Conway CM, Ellis DM: The haemodynamic effects of short acting barbiturates. *Br J Anaesth* 41:532–542, 1969
15. Friesen RH, Lichtor JL: Cardiovascular depression during halothane anesthesia in infants: A study of the three induction techniques. *Anesth Analg* 61:42–45, 1982
16. Hensley FA, Larach DR, Stauffer RA, Waldhausen JA: The effect of halothane/nitrous oxide/oxygen mask induction on arterial hemoglobin saturation in cyanotic heart disease (abstract). *ANESTHESIOLOGY* 63:A3, 1985
17. Nunn JF: *Applied Respiratory Physiology*. London, Butterworths, 1978, pp 388–397
18. Lawler PGP, Nunn JF: A reassessment of the validity of the shunt graph. *Br J Anaesth* 56:1325–1335, 1984
19. Rigg JRA, Rondi P: Changes in rib cage and diaphragm contribution to ventilation after morphine. *ANESTHESIOLOGY* 55:507–514, 1981
20. Dobbinson TL, Gray IG, Nisbet HIA, Pelton DA, Levinson H, Volgyesi G: Thoracic compliance and lung volumes in children with heart disease. *Acta Anaesthesiol Scand* 17:50–56, 1973
21. Shulman D, Beardsmore CS, Aronson HB, Godfrey S: The effect of ketamine on the functional residual capacity in young children. *ANESTHESIOLOGY* 62:551–556, 1985
22. Rehder K, Cameron PD, Krayner S: New dimensions of the respiratory system. *ANESTHESIOLOGY* 62:229–233, 1985
23. Hewlett AM, Hulands GH, Nunn JF, Heath JR: Functional residual capacity during anaesthesia II: Spontaneous respiration. *Br J Anaesth* 46:486–494, 1974
24. Hickey RF, Visick WD, Fairley HB, Fourcade HE: Effects of halothane anesthesia on functional residual capacity and alveolar-arterial oxygen tension differences. *ANESTHESIOLOGY* 38:20–24, 1973
25. Knill RL, Gelb AW: Ventilatory responses to hypoxia and hypercapnia during halothane sedation and anesthesia in man. *ANESTHESIOLOGY* 49:244–251, 1978
26. Eger EI II, Dolan WM, Stevens WC, Miller RD, Way WL: Surgical stimulation antagonizes the respiratory depression produced by Forane. *ANESTHESIOLOGY* 36:544–549, 1972
27. Nunn JF, Matthews RL: Gaseous exchange during halothane anaesthesia: The steady respiratory state. *Br J Anaesth* 31:330–340, 1959
28. Palmisano BW, Fisher DM, Willis M, Gregory GA, Ebert PA: The effect of paralysis on oxygen consumption in normoxic children after cardiac surgery. *ANESTHESIOLOGY* 61:518–522, 1984
29. Rouby JJ, Eurin B, Glaser P, Guillosson JJ, Nafziger J, Guesde R, Viars P: Hemodynamic and metabolic effects of morphine in the critically ill. *Circulation* 64:53–59, 1981
30. Baum D, Brown AC, Church SC: Effect of sedation on oxygen consumption of children undergoing cardiac catheterization. *Pediatrics* 39:891–895, 1967
